# Supplementary material for: The binding of polyvalent galactosides to the lectin Ricinus communis agglutinin 120 (RCA120): an ITC and SPR study
Source: Royal Society of Chemistry journal article supplement (doi:10.1039/c1py00030f), 2011-01-01
Supplement: c1py00030f.pdf [file c1py00030f.pdf]

## Supporting Information

### The binding of polyvalent galactosides to the lectin *Ricinus communis* agglutinin 120 (RCA<sub>120</sub>): an ITC and SPR study

Sebastian G. Spain<sup>a,\*</sup> and Neil R. Cameron<sup>b,\*</sup>

<sup>a</sup> School of Pharmacy, Boots Science Building, University of Nottingham, Nottingham. NG7 2RD. UK. Tel: 0115 8466241; E-mail: [sebastian.spain@nottingham.ac.uk](mailto:sebastian.spain@nottingham.ac.uk). <sup>b</sup> Department of Chemistry, University of Durham, University Science Laboratories, South Road, Durham. DH1 3LE. UK. Tel: 0191 3342008; E-mail: [n.r.cameron@durham.ac.uk](mailto:n.r.cameron@durham.ac.uk)

#### Dynamic-light scattering distribution plots

Dynamic light-scattering was performed as described in the main text.

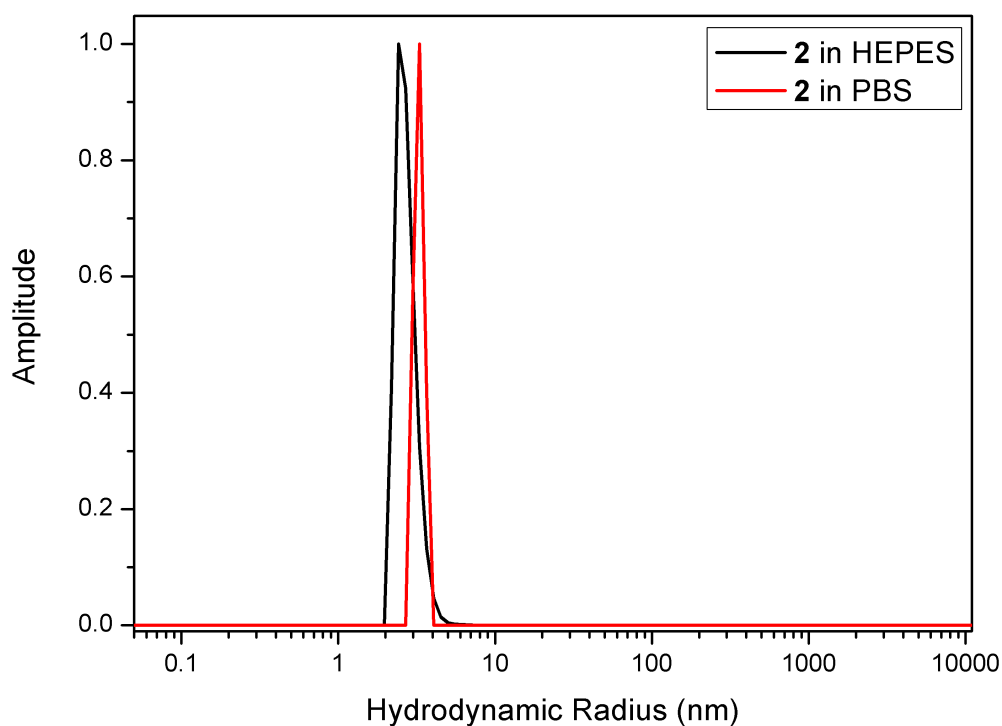

Figure S 1 : Number distribution from DLS of 100  $\mu$ M ligand 2 in HEPES and PBS

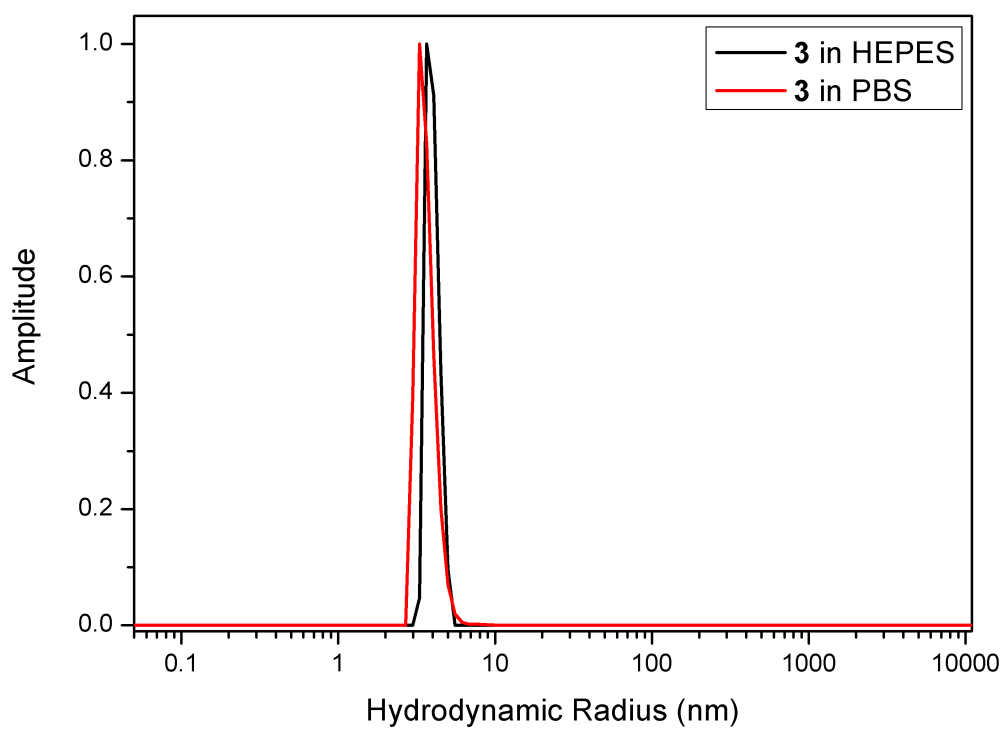

Figure S 2: Number distribution from DLS of 100  $\mu$ M ligand 3 in HEPES and PBS

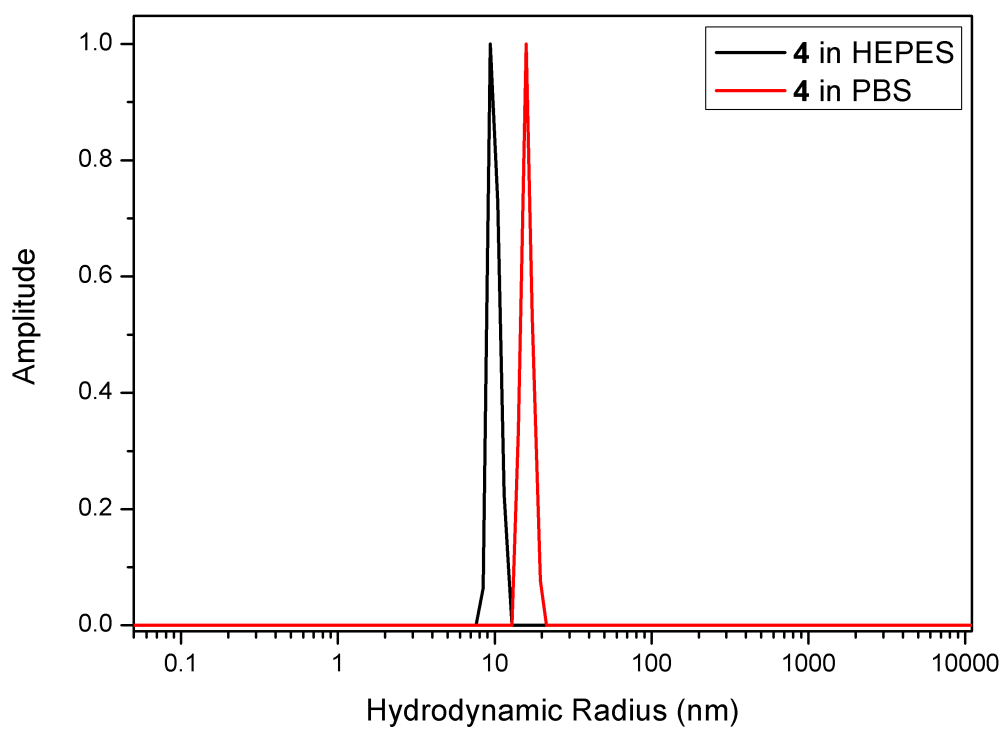

Figure S 3: Number distribution from DLS of 100  $\mu$ M ligand 4 in HEPES and PBS

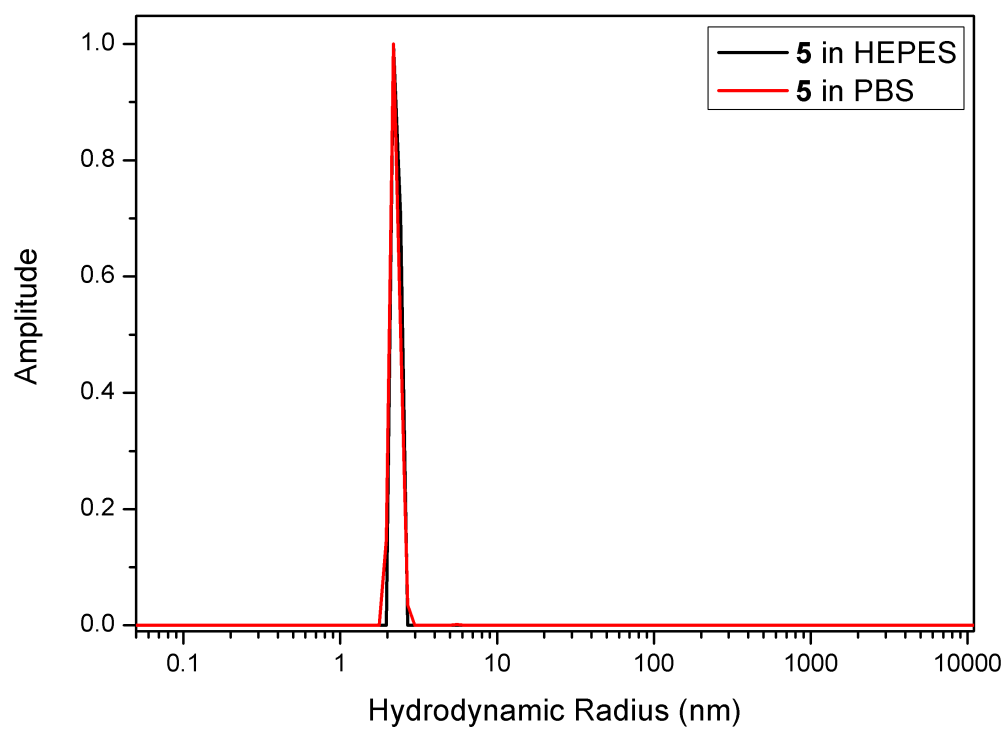

**Figure S 4: Number distribution from DLS of 100  $\mu$ M ligand 5 in HEPES and PBS**
